# Supplementary material for: A natural light induced regioselective 6π-electrocyclisation–oxidative aromatisation reaction: experimental and theoretical insights
Source: Royal Society of Chemistry journal article supplement (doi:10.1039/b811284c), 2008-01-01
Supplement: b811284c.pdf [file b811284c.pdf]

## Electronic Supporting Information

### **A natural light induced regioselective $6\pi$ -electrocyclisation / oxidative aromatisation reaction: Experimental and theoretical insights**

Benjamin E. Moulton,<sup>a</sup> Hao Dong,<sup>b</sup> Ciara T. O'Brien,<sup>a</sup> Simon B. Duckett,<sup>a</sup>  
Zhenyang Lin<sup>b,\*</sup> and Ian J. S. Fairlamb<sup>a,\*</sup>

<sup>a</sup> *Department of Chemistry, University of York, Heslington, York, UK. Fax: 44 (0)1904;  
Tel: 44 (0)1904 434091; E-mail: [ijsf1@york.ac.uk](mailto:ijsf1@york.ac.uk)*

<sup>b</sup> *Department of Chemistry, The Hong Kong University of Science and Technology, Clear  
Water Bay, Kowloon, Hong Kong, P. R. China; E-mail: [chzlin@ust.hk](mailto:chzlin@ust.hk)*

#### **CONTENTS**

- 1. COMPUTATIONAL DETAILS THEORETICAL STUDIES BY DFT**
- 2. NMR SPECTRA FOR COMPOUNDS 5 AND 6**
- 3. REFERENCES**

## 1. COMPUTATIONAL DETAILS THEORETICAL STUDIES BY DFT

Density functional theory calculations at the B3LYP level<sup>1</sup> were performed to calculate the structures of the isomers and the transition states. Frequency calculations were also performed to confirm the characteristics of the calculated structures as minima or transition states. Calculations of intrinsic reaction coordinates (IRC)<sup>2</sup> were also performed on transition states to confirm that such structures are indeed connecting two minima. Time-dependent density functional theory was used to calculate the energy of the first excited state. The standard 6-31G basis set was used.<sup>3</sup> All calculations were carried out with the Gaussian 03 software package.<sup>4</sup>

### Cartesian coordinates of the optimized geometries:

I

E = -1075.7594987 a.u. ZPE = 0.371313 a.u.  
G = -1075.438183 a.u.

|   |             |             |             |
|---|-------------|-------------|-------------|
| C | 2.61259300  | -1.83454600 | 1.27304000  |
| C | 1.56431500  | -0.89491300 | 0.96529500  |
| C | 0.72011100  | -1.05732300 | -0.10748800 |
| C | 0.87210800  | -2.21237900 | -0.95990100 |
| C | 1.85512200  | -3.11955300 | -0.71040600 |
| C | 2.15845300  | -4.35122500 | -1.49759000 |
| C | -0.38557600 | -0.11016600 | -0.36645300 |
| C | -0.33633500 | 1.25630200  | -0.36470500 |
| C | -1.79134200 | -0.65207600 | -0.60995100 |
| C | -2.42477100 | -1.41706700 | 0.60079100  |
| C | -3.79727100 | -1.97596500 | 0.12533000  |
| C | -4.69369400 | -0.68886900 | 0.01989000  |
| C | -3.72074600 | 0.45214700  | 0.42892400  |
| C | -2.68433700 | 0.62228100  | -0.72522000 |
| C | -1.72457900 | 1.78826300  | -0.52129700 |
| C | -2.86805300 | -0.24861400 | 1.52183800  |
| O | 2.70361600  | -2.95893100 | 0.36141400  |
| O | 3.42056700  | -1.80258600 | 2.19814800  |
| O | -2.06438200 | 2.98229900  | -0.46306500 |
| C | 0.83689500  | 2.14825100  | -0.27523600 |
| C | 2.02680600  | 1.85156000  | -0.97192300 |
| C | 0.77512500  | 3.33961300  | 0.47637600  |
| C | 3.12810600  | 2.70583700  | -0.90077400 |
| C | 1.88227400  | 4.19020400  | 0.54879000  |
| C | 3.06169000  | 3.87682800  | -0.13496100 |
| H | 1.47698200  | -0.04697000 | 1.63076400  |
| H | 0.22054500  | -2.35649800 | -1.81085900 |
| H | 1.47236400  | -4.45517800 | -2.34148000 |
| H | 2.07802500  | -5.24047900 | -0.86200700 |
| H | 3.18621700  | -4.31904700 | -1.87687200 |
| H | -1.81371700 | -1.28002200 | -1.50968900 |
| H | -1.76504400 | -2.16614100 | 1.04500200  |
| H | -4.20011000 | -2.68044700 | 0.86119600  |
| H | -3.71451700 | -2.51053600 | -0.82790300 |
| H | -5.10434300 | -0.54049200 | -0.98477100 |
| H | -5.53841100 | -0.73887200 | 0.71602500  |
| H | -4.20407300 | 1.39096100  | 0.70654000  |
| H | -3.18380300 | 0.73301100  | -1.69402600 |
| H | -2.03772100 | 0.35982600  | 1.89293900  |
| H | -3.46373400 | -0.58500900 | 2.37682500  |
| H | 2.08083400  | 0.95486500  | -1.58006200 |
| H | -0.14267300 | 3.60076800  | 0.98716600  |
| H | 4.03475300  | 2.46182200  | -1.44520500 |
| H | 1.81997400  | 5.10024000  | 1.13682400  |
| H | 3.91867200  | 4.54039000  | -0.07860100 |

II

E = -1075.7515742 a.u. ZPE = 0.371474 a.u.  
G = -1075.439632 a.u.

|   |             |             |             |
|---|-------------|-------------|-------------|
| C | 1.49692700  | -3.38450700 | -0.77325600 |
| C | 0.53197400  | -2.32611300 | -0.93537900 |
| C | 0.59108800  | -1.15144300 | -0.21997900 |
| C | 1.64025800  | -0.97842500 | 0.75729300  |
| C | 2.55833900  | -1.96128700 | 0.95351200  |
| C | 3.68908500  | -1.94913900 | 1.92735200  |
| C | -0.44077600 | -0.11012000 | -0.40048000 |
| C | -0.27365200 | 1.24792800  | -0.34317100 |
| C | -1.89581700 | -0.51211800 | -0.62399100 |
| C | -2.56770800 | -1.27899600 | 0.56448000  |
| C | -3.99420900 | -1.69200100 | 0.09885000  |
| C | -4.77601600 | -0.32879600 | 0.07760900  |
| C | -3.69890000 | 0.70144100  | 0.51771700  |
| C | -2.67597600 | 0.83957000  | -0.65285200 |
| C | -1.61335500 | 1.90515600  | -0.41979900 |
| C | -2.88708200 | -0.12492100 | 1.55271100  |
| O | 2.51297700  | -3.12931100 | 0.21865200  |
| O | 1.54981700  | -4.45959800 | -1.36883600 |
| O | -1.84192500 | 3.11949900  | -0.28401100 |
| C | 0.97327400  | 2.03357500  | -0.27999500 |
| C | 2.09277100  | 1.67305700  | -1.05979200 |
| C | 1.05577100  | 3.18968200  | 0.52432900  |
| C | 3.26604400  | 2.42873100  | -1.01775500 |
| C | 2.23451000  | 3.93972100  | 0.56758600  |
| C | 3.34307900  | 3.56234500  | -0.19890900 |
| H | -0.23807000 | -2.51067300 | -1.67217500 |
| H | 1.69399600  | -0.07246800 | 1.34280500  |
| H | 3.70677600  | -1.01421000 | 2.49203600  |
| H | 4.64490800  | -2.06563600 | 1.40379100  |
| H | 3.60143800  | -2.78750800 | 2.62800400  |
| H | -1.99638100 | -1.08651100 | -1.55339100 |
| H | -1.96756700 | -2.10499500 | 0.95225300  |
| H | -4.44072900 | -2.39392900 | 0.81154100  |
| H | -3.97960300 | -2.18518800 | -0.87952400 |
| H | -5.19062400 | -0.09468500 | -0.90890200 |
| H | -5.60900000 | -0.33986200 | 0.78944100  |
| H | -4.09201600 | 1.66349400  | 0.85258200  |
| H | -3.18431800 | 1.04316100  | -1.60184100 |
| H | -1.99929900 | 0.39118700  | 1.93120200  |
| H | -3.49152300 | -0.45190600 | 2.40528200  |
| H | 2.03207600  | 0.80853000  | -1.71227200 |
| H | 0.19268800  | 3.50238400  | 1.09774800  |
| H | 4.11466900  | 2.13918800  | -1.62935000 |
| H | 2.28347400  | 4.82376100  | 1.19527800  |
| H | 4.25439000  | 4.15108200  | -0.16745100 |

### 3a

E = -1075.7260816 a.u. ZPE = 0.372169 a.u.

G = -1075.400855 a.u.

|   |             |             |             |
|---|-------------|-------------|-------------|
| C | -2.96859300 | 1.22880200  | 0.47635000  |
| C | -1.99467800 | 0.32099000  | -0.26967900 |
| C | -0.61367500 | 0.98157400  | -0.35421400 |
| C | -0.62115100 | 2.40596500  | -0.60077900 |
| H | 0.28060500  | 2.89541200  | -0.94997200 |
| C | -1.72955600 | 3.15480800  | -0.41755000 |
| C | -1.92071800 | 4.60971000  | -0.67327800 |
| H | -1.00626000 | 5.05507300  | -1.07318600 |
| H | -2.19588700 | 5.13264300  | 0.25060100  |
| H | -2.73415100 | 4.77662100  | -1.39030000 |
| C | 0.50204600  | 0.19825600  | -0.36595700 |
| C | 0.43201100  | -1.24880100 | -0.31181600 |
| C | -0.75025300 | -1.92462100 | -0.08719400 |
| C | -0.87427300 | -3.35285000 | -0.16532900 |
| H | 0.03120500  | -3.92584500 | -0.32352200 |
| C | -2.10246400 | -3.95412200 | -0.12003400 |
| H | -2.17669700 | -5.03307600 | -0.21492500 |
| C | -3.32179900 | -3.18060400 | -0.00334100 |
| H | -4.27511300 | -3.69600000 | -0.06622600 |
| C | -3.28110100 | -1.84171900 | 0.18140000  |
| H | -4.18703000 | -1.26225900 | 0.30998700  |
| C | -1.97005200 | -1.10444900 | 0.34474000  |
| C | 1.93933200  | 0.65946300  | -0.55980500 |
| H | 2.02491800  | 1.31305600  | -1.43665100 |
| C | 2.60123900  | 1.33959800  | 0.68722500  |
| H | 1.96938700  | 2.09766100  | 1.15634000  |
| C | 4.00359300  | 1.85268600  | 0.25064700  |
| H | 4.43410000  | 2.49951900  | 1.02335100  |
| H | 3.95718600  | 2.43591900  | -0.67627000 |
| C | 4.83654600  | 0.52914700  | 0.09015000  |
| H | 5.23830000  | 0.40279000  | -0.92112300 |
| H | 5.68409100  | 0.50930500  | 0.78472900  |
| C | 3.80990800  | -0.58014500 | 0.45253100  |
| H | 4.25036000  | -1.54857200 | 0.69871500  |
| C | 2.77211500  | -0.66545900 | -0.70908000 |
| H | 3.27314100  | -0.77003700 | -1.67798300 |
| C | 1.77308800  | -1.81226400 | -0.54100400 |
| C | 2.98028100  | 0.11681500  | 1.56497300  |
| H | 2.11822000  | -0.46617300 | 1.90380100  |
| H | 3.58330300  | 0.39123500  | 2.43736800  |
| O | -2.89810000 | 2.58621500  | 0.15625800  |
| O | -3.82819900 | 0.87028800  | 1.27495100  |
| O | 2.09551400  | -3.01954300 | -0.57917900 |
| H | -1.84106800 | -0.95638300 | 1.43930500  |
| H | -2.39340900 | 0.25675300  | -1.30402800 |

### 3a'

E = -1075.7081695 a.u. ZPE = 0.372141 a.u.

G = -1075.383162 a.u.

|   |             |             |             |
|---|-------------|-------------|-------------|
| C | 3.32521200  | -0.69556400 | -0.24321800 |
| C | 2.01390200  | -0.07458000 | -0.70682500 |
| C | 0.77152500  | -0.91828100 | -0.42545000 |
| C | 0.96550900  | -2.32899300 | -0.19306500 |
| H | 0.10216900  | -2.98230500 | -0.15868800 |
| C | 2.18536500  | -2.87534000 | -0.01173100 |
| C | 2.53463500  | -4.30442800 | 0.22333600  |
| H | 1.63640600  | -4.92712600 | 0.21972800  |
| H | 3.04518400  | -4.42732500 | 1.18638000  |
| H | 3.22004100  | -4.67024400 | -0.55115300 |
| C | -0.44082000 | -0.31530900 | -0.56304200 |
| C | -0.57034500 | 1.12843600  | -0.69520100 |
| C | 0.47214700  | 1.99040800  | -0.44159200 |
| C | 0.29748000  | 3.38790200  | -0.11121700 |
| H | -0.61385900 | 3.88040800  | -0.42689600 |
| C | 1.18076600  | 3.98808500  | 0.74228000  |
| H | 1.01302800  | 5.01303900  | 1.05856800  |
| C | 2.28219600  | 3.24545200  | 1.33304400  |
| H | 2.84285400  | 3.70110700  | 2.14316300  |
| C | 2.61212100  | 2.01360900  | 0.88112600  |

|   |             |             |             |
|---|-------------|-------------|-------------|
| H | 3.46903000  | 1.47822800  | 1.26800300  |
| C | 1.90131800  | 1.46288300  | -0.34489900 |
| C | -1.81434900 | -0.97473600 | -0.56083800 |
| H | -1.85418000 | -1.77035100 | -1.31505900 |
| C | -2.32858500 | -1.51985600 | 0.81700200  |
| H | -1.58177800 | -2.09431900 | 1.37006100  |
| C | -3.65450900 | -2.28787500 | 0.54577300  |
| H | -3.96474200 | -2.84494000 | 1.43706600  |
| H | -3.55301700 | -3.00936800 | -0.27302500 |
| C | -4.67346100 | -1.13761700 | 0.21352500  |
| H | -5.11012400 | -1.23664500 | -0.78628700 |
| H | -5.50037100 | -1.12219600 | 0.93252600  |
| C | -3.81068600 | 0.14806900  | 0.34739200  |
| H | -4.38006500 | 1.07273900  | 0.46154100  |
| C | -2.82528400 | 0.19202500  | -0.86040100 |
| H | -3.35712300 | 0.08632600  | -1.81268200 |
| C | -1.99198300 | 1.47467700  | -0.88595800 |
| C | -2.85570200 | -0.23569800 | 1.51032000  |
| H | -2.07879700 | 0.50918300  | 1.70890500  |
| H | -3.38612400 | -0.44731000 | 2.44518100  |
| O | 3.35132500  | -2.06664800 | 0.00358500  |
| O | 4.38475000  | -0.08212500 | -0.14547200 |
| O | -2.48035900 | 2.61526000  | -1.02624400 |
| H | 2.43230900  | 1.96381400  | -1.17679300 |
| H | 2.11470700  | -0.08421400 | -1.80765300 |

### V

E = -1075.6871596 a.u. ZPE = 0.369024 a.u.

G = -1075.367564 a.u.

|   |             |             |             |
|---|-------------|-------------|-------------|
| C | 1.06483400  | 3.70082300  | -0.34986000 |
| C | 0.20433700  | 2.71791400  | -0.09786200 |
| C | 0.47010200  | 1.29019700  | -0.15841200 |
| C | 1.91564700  | 0.82117300  | -0.38601000 |
| C | 2.72321200  | 1.06857700  | 0.90863100  |
| C | 2.67965800  | 0.05755200  | 2.02856700  |
| C | -0.49641400 | 0.35546300  | 0.09400000  |
| C | -0.20623500 | -1.06808800 | 0.16031400  |
| C | -1.95132200 | 0.61863900  | 0.45719000  |
| C | -2.89000000 | 1.02571100  | -0.73054500 |
| C | -4.27808800 | 1.38583700  | -0.12676700 |
| C | -4.84992800 | -0.01030700 | 0.31445800  |
| C | -3.72326800 | -0.99969300 | -0.09509600 |
| C | -2.52457700 | -0.78493800 | 0.87926500  |
| C | -1.38841600 | -1.78664200 | 0.66254900  |
| C | -3.19036400 | -0.34323700 | -1.39755600 |
| O | 3.34735900  | 2.13818600  | 1.02235200  |
| O | 1.77499600  | 4.62318800  | -0.58602600 |
| O | -1.49725800 | -3.01522600 | 0.86657800  |
| C | 1.00211500  | -1.59377100 | -0.24526900 |
| C | 1.95144400  | -0.62290500 | -0.94832000 |
| C | 1.37698400  | -2.97491700 | -0.13706800 |
| C | 3.35352600  | -1.14788100 | -1.13044400 |
| C | 2.63532700  | -3.38916800 | -0.48239400 |
| C | 3.64658000  | -2.45551200 | -0.94534400 |
| H | -0.79386400 | 3.05276800  | 0.17166600  |
| H | 3.17993300  | 0.47326600  | 2.90543800  |
| H | 3.18359600  | -0.86953500 | 1.73154300  |
| H | 1.64608700  | -0.20495500 | 2.27849600  |
| H | -2.02192800 | 1.35864100  | 1.26476700  |
| H | -2.46759800 | 1.79709600  | -1.37946600 |
| H | -4.91747100 | 1.85396000  | -0.88361400 |
| H | -4.19260600 | 2.08868000  | 0.70997200  |
| H | -5.06690700 | -0.05721900 | 1.38714900  |
| H | -5.77876900 | -0.24317300 | -0.21851800 |
| H | -4.03371000 | -2.04461900 | -0.16060600 |
| H | -2.85153600 | -0.83552800 | 1.92395500  |
| H | -2.30442100 | -0.83604200 | -1.81013600 |
| H | -3.95175000 | -0.27424200 | -2.18214400 |
| H | 0.64354900  | -3.66469300 | 0.26326100  |
| H | 4.10998400  | -0.44397700 | -1.46808400 |
| H | 2.90701000  | -4.43429000 | -0.37300400 |
| H | 4.65146200  | -2.82517700 | -1.12531300 |

H 2.38921500 1.46937800 -1.13404700  
H 1.51802300 -0.51848000 -1.96870900

#### 4a

E = -1074.6000848 a.u. ZPE = 0.351060 a.u.  
G = -1074.295180 a.u.

C -3.09608600 1.21768800 0.13987600  
C -1.91745200 0.35332500 -0.01375500  
C -0.66026500 0.96660900 -0.22723300  
C -0.54359300 2.40140100 -0.31876000  
H 0.42145700 2.85240000 -0.50103700  
C -1.63179300 3.19356300 -0.19031700  
C -1.69740700 4.68181900 -0.26269300  
H -0.70772400 5.10574300 -0.44929500  
H -2.08928000 5.09566200 0.67370300  
H -2.37559400 4.99832300 -1.06352400  
C 0.49441800 0.13998900 -0.37043200  
C 0.38735000 -1.23827800 -0.33300400  
C -0.86190400 -1.90144000 -0.12141500  
C -0.95715500 -3.31650300 -0.07433700  
H -0.05213100 -3.89569600 -0.20517200  
C -2.17873200 -3.92920800 0.13689700  
H -2.24432100 -5.01183400 0.17233100  
C -3.33991900 -3.14524200 0.30711600  
H -4.29701500 -3.62950700 0.47304200  
C -3.27941300 -1.76259400 0.26561900  
H -4.17559400 -1.17591700 0.39673800  
C -2.04213300 -1.09130700 0.04950400  
C 1.92065400 0.61311600 -0.58499000  
H 1.99050000 1.26735000 -1.46272700  
C 2.61231200 1.28752100 0.65391100  
H 2.00063700 2.04684200 1.14666400  
C 4.00476500 1.79626500 0.18086500  
H 4.45719600 2.43932000 0.94389100  
H 3.93678400 2.38201900 -0.74304000  
C 4.82759300 0.47008200 -0.00407100  
H 5.20116900 0.34405100 -1.02609500  
H 5.69338200 0.44583600 0.66711700  
C 3.80742700 -0.63594900 0.38495100  
H 4.25027900 -1.60609300 0.61915500  
C 2.73938200 -0.71568500 -0.74782900  
H 3.20826100 -0.82937700 -1.73148000  
C 1.72760200 -1.84253200 -0.54228900  
C 3.00873300 0.06195300 1.51892500  
H 2.15463500 -0.51878600 1.88031600  
H 3.63370900 0.33407300 2.37612300  
O -2.87092900 2.62333000 0.03904800  
O -4.26774100 0.89551800 0.34762400  
O 2.01959000 -3.05284400 -0.54241400

#### TS<sub>I-3a</sub><sup>‡</sup>

E = -1075.6898556 a.u. ZPE = 0.370914 a.u.  
G = -1075.366065 a.u.

C -3.23666200 0.95833800 -0.66555600  
C -1.93332100 0.34650900 -1.02331800  
C -0.70867300 0.97323500 -0.55090100  
C -0.81252300 2.25717600 0.09899000  
H 0.08249100 2.79429200 0.37766900  
C -2.01121700 2.81264100 0.39761600  
C -2.27422000 4.11935000 1.06579800  
H -1.33706900 4.63875700 1.28193100  
H -2.82053800 3.97580300 2.00593900  
H -2.89493600 4.76119800 0.42888400  
C 0.48454400 0.24912900 -0.69262600  
C 0.50269100 -1.17403300 -0.66000700  
C -0.60355600 -1.97342600 -0.25531300  
C -0.42499600 -3.00951500 0.70722800  
H 0.58004400 -3.36065300 0.90366100  
C -1.49444800 -3.48334400 1.44282300  
H -1.32600800 -4.22783500 2.21427800  
C -2.81307000 -2.97865100 1.23273400

H -3.62876400 -3.34808300 1.84639800  
C -3.06112900 -2.09045300 0.21852700  
H -4.06933500 -1.77395500 -0.02476400  
C -1.97878400 -1.59592000 -0.61973700  
C 1.90581500 0.81469300 -0.71522300  
H 1.99617100 1.53948700 -1.53302900  
C 2.49179700 1.44234700 0.60516800  
H 1.81253600 2.10818900 1.13840600  
C 3.84804400 2.10570600 0.22351400  
H 4.21894900 2.71943600 1.05217800  
H 3.75544500 2.75785500 -0.65210500  
C 4.78937200 0.87453300 -0.03515300  
H 5.18809800 0.85641100 -1.05536100  
H 5.64398500 0.87840500 0.65079900  
C 3.86444500 -0.34037500 0.24872600  
H 4.38344000 -1.28335400 0.43054400  
C 2.82814300 -0.44068400 -0.90760700  
H 3.31428600 -0.48470900 -1.88879500  
C 1.90434200 -1.64286300 -0.72895000  
C 2.97274200 0.20037900 1.39853000  
H 2.16521900 -0.47965500 1.68743600  
H 3.54273600 0.46786000 2.29485600  
O -3.20748300 2.14412300 0.09049200  
O -4.33780700 0.49426100 -0.96347300  
O 2.30332200 -2.82139300 -0.64109800  
H -2.19495200 -1.74117300 -1.67493200  
H -1.91208700 0.11717500 -2.08293700

#### 2a\_H<sup>+</sup>

E = -1076.1207802 a.u. ZPE = 0.383770 a.u.  
G = -1076.786441 a.u.

C -2.42262800 2.18284500 0.84496500  
C -1.66259600 1.05575800 0.63495000  
C -0.49822600 1.14235500 -0.16161900  
C -0.16781700 2.43130400 -0.70533500  
C -0.95450700 3.52731200 -0.49732000  
C -0.78010500 4.91167900 -1.00454100  
C 0.39977000 0.01882300 -0.37233400  
C 0.08868200 -1.32336400 -0.28978900  
C 1.88975600 0.25908500 -0.64338400  
C 2.67615700 0.99043200 0.49915500  
C 4.12373500 1.23286200 -0.02074500  
C 4.75682000 -0.20495300 -0.00557000  
C 3.59184500 -1.09763100 0.50332500  
C 2.52606900 -1.16915500 -0.63740700  
C 1.37564700 -2.11218400 -0.34641600  
C 2.89884300 -0.15507500 1.52298800  
O -2.09914500 3.38735000 0.29176800  
O -3.52061200 2.18941500 1.60179000  
O 1.46555400 -3.33113100 -0.15316400  
C -1.20871000 -1.99703500 -0.24600000  
C -2.27458700 -1.56624700 -1.07372600  
C -1.39814500 -3.13854200 0.56864200  
C -3.49431200 -2.23863600 -1.06697700  
C -2.63083600 -3.79476900 0.58347100  
C -3.67951700 -3.35003900 -0.23013000  
H -1.97499000 0.13411700 1.10111100  
H 0.71641700 2.55032200 -1.31458400  
H 0.12120600 4.98465500 -1.61547800  
H -0.70032900 5.62261600 -0.17398300  
H -1.64119200 5.21426200 -1.61177500  
H 2.02959600 0.77100700 -1.60433500  
H 2.18462600 1.88995100 0.88017400  
H 4.66092100 1.90958400 0.65134400  
H 4.13456400 1.68674200 -1.01824000  
H 5.11906000 -0.51871900 -0.98969000  
H 5.60390300 -0.25526600 0.68598100  
H 3.89085900 -2.08301900 0.86428700  
H 2.98596700 -1.45328900 -1.59022100  
H 1.97410700 -0.56097900 1.94710200  
H 3.55732600 0.13738800 2.34625900

|   |             |             |             |
|---|-------------|-------------|-------------|
| H | -2.12181200 | -0.73314700 | -1.75242400 |
| H | -0.58306400 | -3.50299300 | 1.17934100  |
| H | -4.29434100 | -1.91415800 | -1.72357300 |
| H | -2.76786800 | -4.66064600 | 1.22147000  |
| H | -4.62954000 | -3.87330500 | -0.22673800 |
| H | -3.96380700 | 3.06086000  | 1.68359900  |

### 3a<sup>+</sup><sub>H</sub>

E = -1076.0464482 a.u. ZPE = 0.383716 a.u.

G = -1076.710037 a.u.

|   |             |             |             |
|---|-------------|-------------|-------------|
| C | 3.32521200  | -0.69556400 | -0.24321800 |
| C | 2.01390200  | -0.07458000 | -0.70682500 |
| C | 0.77152500  | -0.91828100 | -0.42545000 |
| C | 0.96550900  | -2.32899300 | -0.19306500 |
| H | 0.10216900  | -2.98230500 | -0.15868800 |
| C | 2.18536500  | -2.87534000 | -0.01173100 |
| C | 2.53463500  | -4.30442800 | 0.22333600  |
| H | 1.63640600  | -4.92712600 | 0.21972800  |
| H | 3.04518400  | -4.42732500 | 1.18638000  |
| H | 3.22004100  | -4.67024400 | -0.55115300 |
| C | -0.44082000 | -0.31530900 | -0.56304200 |
| C | -0.57034500 | 1.12843600  | -0.69520100 |
| C | 0.47214700  | 1.99040800  | -0.44159200 |
| C | 0.29748000  | 3.38790200  | -0.11121700 |
| H | -0.61385900 | 3.88040800  | -0.42689600 |
| C | 1.18076600  | 3.98808500  | 0.74228000  |
| H | 1.01302800  | 5.01303900  | 1.05856800  |
| C | 2.28219600  | 3.24545200  | 1.33304400  |
| H | 2.84285400  | 3.70110700  | 2.14316300  |
| C | 2.61212100  | 2.01360900  | 0.88112600  |
| H | 3.46903000  | 1.47822800  | 1.26800300  |
| C | 1.90131800  | 1.46288300  | -0.34489900 |
| C | -1.81434900 | -0.97473600 | -0.56083800 |
| H | -1.85418000 | -1.77035100 | -1.31505900 |
| C | -2.32858500 | -1.51985600 | 0.81700200  |
| H | -1.58177800 | -2.09431900 | 1.37006100  |
| C | -3.65450900 | -2.28787500 | 0.54577300  |
| H | -3.96474200 | -2.84494000 | 1.43706600  |
| H | -3.55301700 | -3.00936800 | -0.27302500 |
| C | -4.67346100 | -1.13761700 | 0.21352500  |
| H | -5.11012400 | -1.23664500 | -0.78628700 |
| H | -5.50037100 | -1.12219600 | 0.93252600  |
| C | -3.81068600 | 0.14806900  | 0.34739200  |
| H | -4.38006500 | 1.07273900  | 0.46154100  |
| C | -2.82528400 | 0.19202500  | -0.86040100 |
| H | -3.35712300 | 0.08632600  | -1.81268200 |
| C | -1.99198300 | 1.47467700  | -0.88595800 |
| C | -2.85570200 | -0.23569800 | 1.51032000  |
| H | -2.07879700 | 0.50918300  | 1.70890500  |
| H | -3.38612400 | -0.44731000 | 2.44518100  |
| O | 3.35132500  | -2.06664800 | 0.00358500  |
| O | 4.43806068  | -0.05125980 | -0.14055391 |
| O | -2.48035900 | 2.61526000  | -1.02624400 |
| H | 2.43230900  | 1.96381400  | -1.17679300 |
| H | 2.11470700  | -0.08421400 | -1.80765300 |
| H | 5.17187915  | -0.66250795 | -0.23795082 |

### 3a<sup>+</sup><sub>H</sub>

E = -1076.0641901 a.u. ZPE = 0.383885 a.u.

G = -1076.727395 a.u.

|   |             |            |             |
|---|-------------|------------|-------------|
| C | -2.83352300 | 1.26576800 | 0.45369600  |
| C | -1.98765200 | 0.30664300 | -0.31850800 |
| C | -0.59545500 | 0.97305200 | -0.38851600 |
| C | -0.58449600 | 2.38233100 | -0.66897100 |
| H | 0.32303000  | 2.84571000 | -1.03922900 |
| C | -1.65916800 | 3.18015700 | -0.47828100 |
| C | -1.92279800 | 4.61716900 | -0.73169700 |
| H | -1.03148600 | 5.07687600 | -1.16651700 |
| H | -2.17026500 | 5.15234300 | 0.19235700  |
| H | -2.75208800 | 4.76174800 | -1.43449600 |
| C | 0.52217300  | 0.17141000 | -0.38754300 |

|   |             |             |             |
|---|-------------|-------------|-------------|
| C | 0.44218300  | -1.25868000 | -0.29589800 |
| C | -0.75192900 | -1.93297400 | -0.09798500 |
| C | -0.87007700 | -3.35703500 | -0.14445400 |
| H | 0.03938600  | -3.93455400 | -0.25547500 |
| C | -2.10323800 | -3.96006600 | -0.13458600 |
| H | -2.16953500 | -5.04042300 | -0.20775600 |
| C | -3.32849700 | -3.19231800 | -0.09735800 |
| H | -4.27449100 | -3.71123200 | -0.20587600 |
| C | -3.29628400 | -1.84860000 | 0.05732800  |
| H | -4.21325900 | -1.27183000 | 0.10361600  |
| C | -1.99088600 | -1.12022800 | 0.28560200  |
| C | 1.95944000  | 0.62282400  | -0.58625400 |
| H | 2.04738100  | 1.24935300  | -1.48162200 |
| C | 2.60738100  | 1.34459900  | 0.65118900  |
| H | 1.97119200  | 2.11673300  | 1.09175600  |
| C | 4.00989500  | 1.84781300  | 0.20238100  |
| H | 4.42954900  | 2.52000400  | 0.95793700  |
| H | 3.96876100  | 2.40265000  | -0.74148600 |
| C | 4.84869000  | 0.52379000  | 0.09058000  |
| H | 5.25954400  | 0.36663200  | -0.91182700 |
| H | 5.68978200  | 0.52938800  | 0.79132000  |
| C | 3.82523400  | -0.57738900 | 0.48374100  |
| H | 4.26685200  | -1.53565000 | 0.76237000  |
| C | 2.79412900  | -0.70448100 | -0.68309900 |
| H | 3.29982000  | -0.84130000 | -1.64465800 |
| C | 1.79500400  | -1.83878700 | -0.48190200 |
| C | 2.98525600  | 0.15034700  | 1.56778700  |
| H | 2.12695500  | -0.42773900 | 1.92673300  |
| H | 3.58240800  | 0.45713000  | 2.43194700  |
| O | -2.77869100 | 2.55403200  | 0.24346500  |
| O | -3.69785800 | 0.85353000  | 1.36621900  |
| O | 2.08828600  | -3.04755800 | -0.46527600 |
| H | -1.89483000 | -1.00450500 | 1.38722700  |
| H | -2.41409100 | 0.26650500  | -1.34639600 |
| H | -4.17079800 | 1.57005800  | 1.85129400  |

## 2. NMR SPECTRA FOR COMPOUNDS 5 AND 6

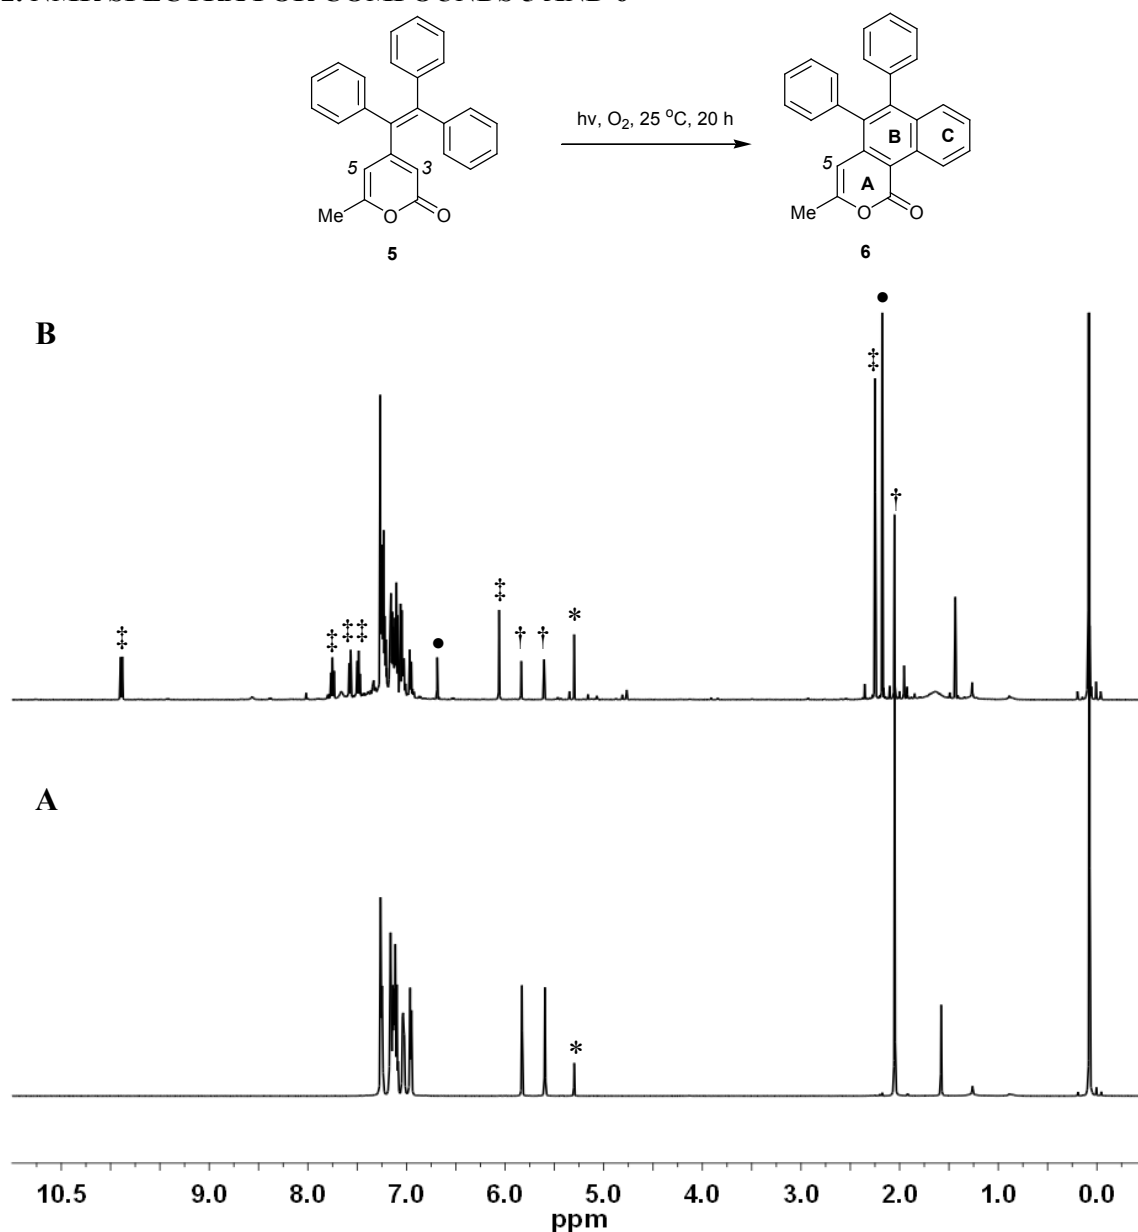

**Figure S1.** **A:** <sup>1</sup>H NMR spectrum of compound **5** in CDCl<sub>3</sub> at  $t = 0$ . **B:** <sup>1</sup>H NMR spectrum following 20 h of irradiation (400 nm). Key: ‡ = proton resonances from **6**; † = proton resonances from **5**; \* = residual CH<sub>2</sub>Cl<sub>2</sub>; ● = Uncharacterised product(s).

**Comment:** A characteristic proton resonance (*H5*) for compound **6** is observed at  $\delta = 6.06$  (1H, q,  $J = 1$  Hz), which is coupled ( $^4J$ ) to the methyl group in ring **A** at  $\delta = 2.25$  (3H, d,  $J = 1$  Hz). Both the *H3* and *H5* chemical shifts for compound **2a** and the *H5* chemical shift for **4a** can be compared with the similar proton environments in compounds **5** and **6**, respectively. Specifically, the *H5* resonance becomes deshielded on forming the electrocycloisatation / aromatisation product **6**. Four separate deshielded aromatic proton resonances are also observed for **6** { $\delta = 9.89$  (1H, d,  $J = 8.5$  Hz); 7.75 (1H, ddd,  $J = 1.3, 6.8, 8.4$  Hz); 7.57 (1H, dd,  $J = 0.9, 8.4$  Hz); 7.48 (1H, ddd,  $J = 1.3, 6.8, 8.5$  Hz)} are observed which are characteristic of ring **C**. Further characterisation of compound **6** has not been possible, as prolonged irradiation leads to degradation.

#### 4. REFERENCES

---

- 1 (a) A. D. Becke, *J. Chem. Phys.*, 1993, **98**, 5648. (b) B. Miehlich, A. Savin, H. Stoll and H. Preuss, *Chem. Phys. Lett.*, 1989, **157**, 200. (c) C. Lee, W. Yang and G. Parr, *Phys. Rev.* 1988, **B37**, 785.
- 2 (a) K. Fukui, *J. Phys. Chem.*, 1970, **74**, 4161. (b) K. Fukui, *Acc. Chem. Res.*, 1981, **14**, 363.
- 3 P. C. Hariharan and J. A. Pople, *Theor. Chim. Acta*, 1973, **28**, 213.
- 4 (Full citation): M. J. Frisch, G. W. Trucks, H. B. Schlegel, G. E. Scuseria, M. A. Robb, J. R. Cheeseman, J. A. Montgomery, T. Vreven Jr., K. N. Kudin, J. C. Burant, J. M. Millam, S. S. Iyengar, J. Tomasi, V. Barone, B. Mennucci, M. Cossi, G. Scalmani, N. Rega, G. A. Petersson, H. Nakatsuji, M. Hada, M. Ehara, K. Toyota, R. Fukuda, J. Hasegawa, M. Ishida, T. Nakajima, Y. Honda, O. Kitao, H. Nakai, M. Klene, X. Li, J. E. Knox, H. P. Hratchian, J. B. Cross, C. Adamo, J. Jaramillo, R. Gomperts, R. E. Stratmann, O. Yazyev, A. J. Austin, R. Cammi, C. Pomelli, J. W. Ochterski, P. Y. Ayala, K. Morokuma, G. A. Voth, P. Salvador, J. J. Dannenberg, V. G. Zakrzewski, S. Dapprich, A. D. Daniels, M. C. Strain, O. Farkas, D. K. Malick, A. D. Rabuck, K. Raghavachari, J. B. Foresman, J. V. Ortiz, Q. Cui, A. G. Baboul, S. Clifford, J. Cioslowski, B. B. Stefanov, G. Liu, A. Liashenko, P. Piskorz, I. Komaromi, R. L. Martin, D. J. Fox, T. Keith, M. A. Al-Laham, C. Y. Peng, A. Nanayakkara, M. Challacombe, P. M. W. Gill, B. Johnson, W. Chen, M. W. Wong, C. Gonzalez and J. A. Pople, *Gaussian 03*, revision B05; Gaussian, Inc.: Pittsburgh, PA, 2003.
